# Supplementary material for: The peroxidation-derived DNA adduct, 6-oxo-M1dG, is a strong block to replication by human DNA polymerase η
Source: PubMed Central journal article supplement — J Biol Chem. 2023 Jul 18;299(8):105067. doi: 10.1016/j.jbc.2023.105067 (PMC10450521; doi:10.1016/j.jbc.2023.105067), 2023-07-18
Supplement: mmc1.pdf [file mmc1.pdf]

## Supporting Information

# The peroxidation-derived DNA adduct, 6-oxo-M<sub>1</sub>dG, is a strong block to replication by human DNA polymerase $\eta$ : structural and functional evaluation

Robyn Richie-Jannetta<sup>1</sup>, Pradeep Pallan<sup>2</sup>, Philip J. Kingsley<sup>1</sup>, Nikhil Kamdar<sup>1</sup>, Martin Egli<sup>2</sup>, and Lawrence J. Marnett<sup>1,\*</sup>

<sup>1</sup> A. B. Hancock, Jr., Memorial Laboratory for Cancer Research, Departments of Biochemistry, Chemistry and Pharmacology, Vanderbilt Institute of Chemical Biology, Center for Structural Biology and Vanderbilt-Ingram Cancer Center, Vanderbilt University School of Medicine, Nashville, Tennessee 37232, USA

<sup>2</sup> Department of Biochemistry, Vanderbilt Institute of Chemical Biology, Center for Structural Biology, Vanderbilt University School of Medicine, Nashville, Tennessee 37232, USA

\*Corresponding author:

Lawrence J. Marnett

Vanderbilt University

Tel.: 615-322-0907

Email: [larry.marnett@vanderbilt.edu](mailto:larry.marnett@vanderbilt.edu)

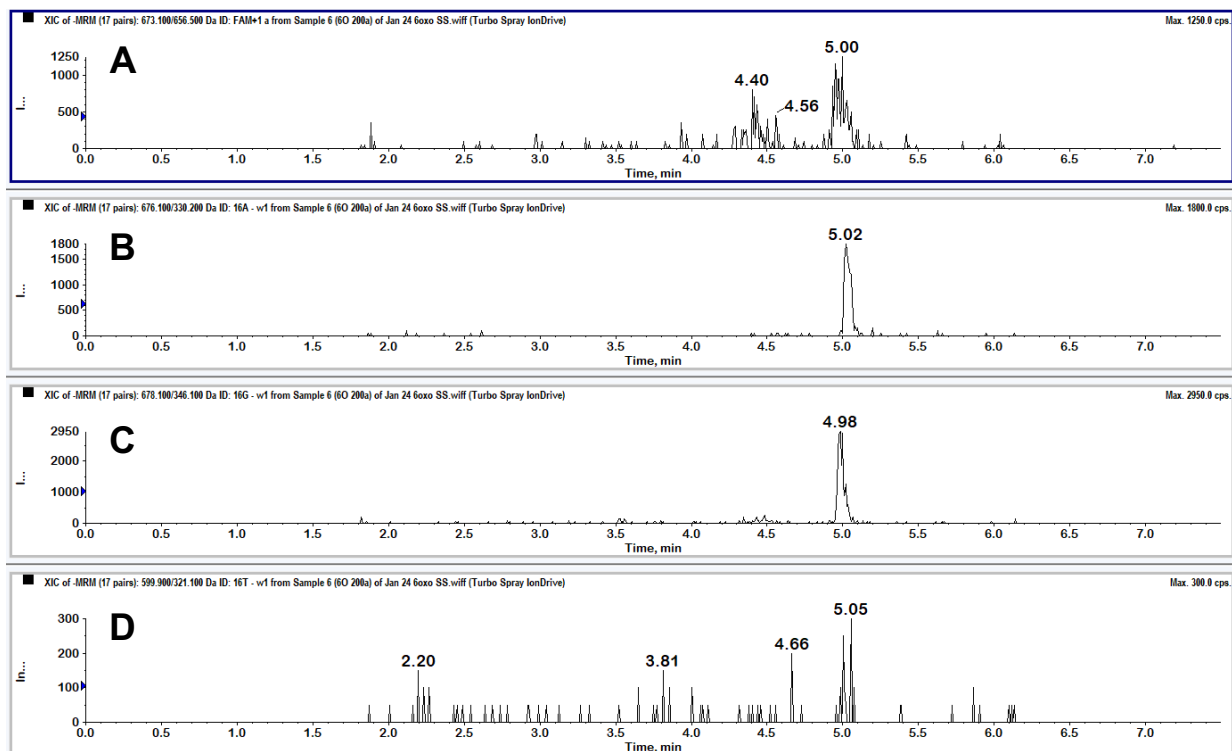

**Figure S1.** LC-MS chromatogram of 16 nucleotide products from extension of 6-oxo-M<sub>1</sub>dG template-primer duplex by hPol  $\eta$ . HPol  $\eta$  (200 nM) was incubated for 40 min. with 5  $\mu$ M DNA duplex and a 500  $\mu$ M mix of all four dNTPs in a 10  $\mu$ l reaction volume. The FAM-labeled complementary primer (5'-FAM-CGC TCG TAA GGA TTC-3') extended by a dCMP on the 3' end was detected by SRM in positive ion mode with the following transition: 673.1 $\rightarrow$ 656.5 (A). Extension by a dAMP (transition 676.1 $\rightarrow$ 330.2), dGMP (transition 678.1 $\rightarrow$ 346.1), or dTMP (transition 599.9 $\rightarrow$ 321.1) on the 3' end is shown in panels B-D, respectively.

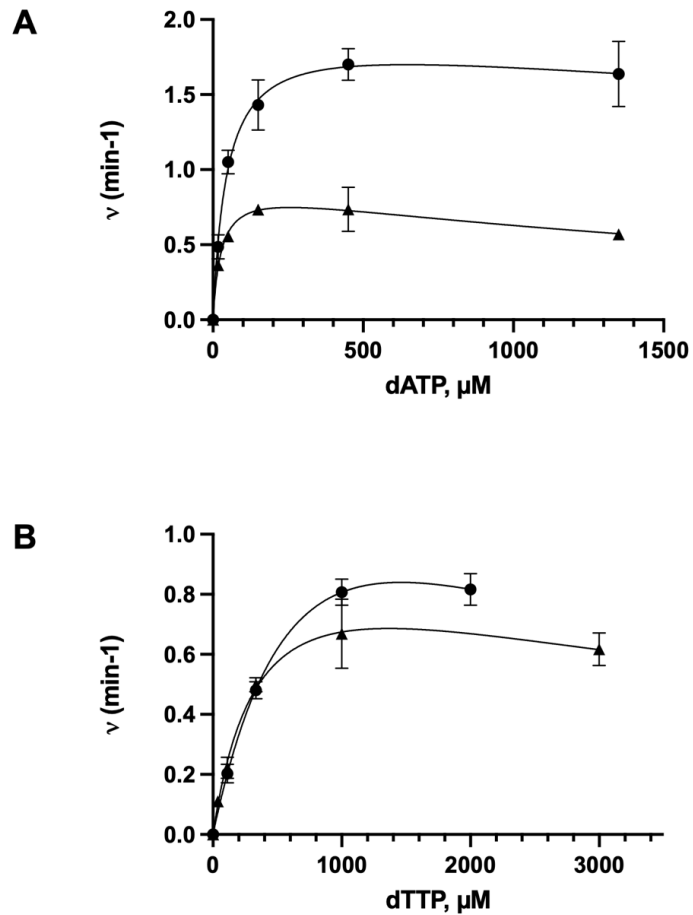

**Figure S2.** Steady state kinetics data for dATP (A) and dTTP (B) incorporation opposite dG or 6-oxo-M<sub>1</sub>dG by hPol  $\eta$ . Control (●) and 6-oxo-M<sub>1</sub>dG (▲) oligonucleotide duplexes (5  $\mu\text{M}$ ) were incubated with 25 nM or 100 nM hPol  $\eta$ , respectively, and increasing concentrations of dATP for 5 min. (A). Control (●) and 6-oxo-M<sub>1</sub>dG (▲) oligonucleotide duplexes (5  $\mu\text{M}$ ) were incubated with 40 nM hPol  $\eta$  and increasing concentrations of dTTP for 5 min. Each point represents the mean and standard deviation of triplicate determinations. Data were analyzed using the Substrate Inhibition model in GraphPad Prism.

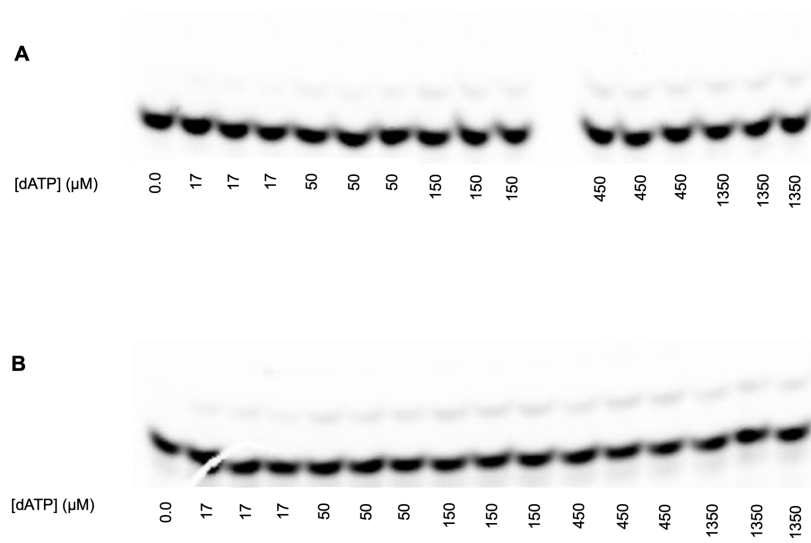

**Figure S3.** Incorporation of dATP opposite dG (control template, A) and 6-oxo-M<sub>1</sub>dG (B). hPol  $\eta$  (25 nM for control duplex or 100 nM for 6-oxo-M<sub>1</sub>dG duplex) was incubated with 5  $\mu\text{M}$  DNA duplex and increasing concentrations of nucleotides. The reaction was stopped at 5 min.

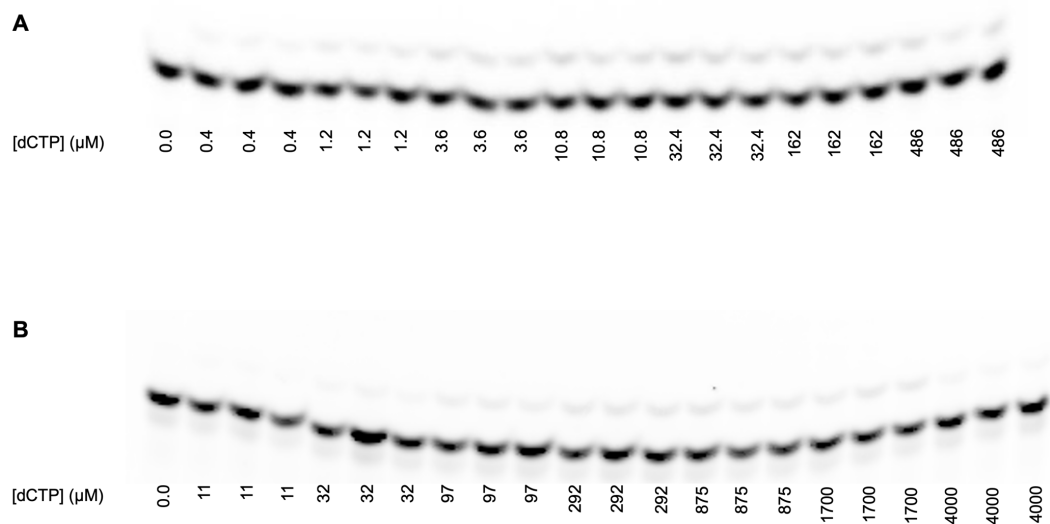

**Figure S4.** Incorporation of dCTP opposite dG (control template, A) and 6-oxo-M<sub>1</sub>dG (B). hPol  $\eta$  (10 nM for control duplex or 200 nM for 6-oxo-M<sub>1</sub>dG duplex) was incubated with 5  $\mu$ M DNA duplex and increasing concentrations of nucleotides. The reaction was stopped at 6 min for control duplex or 10 min for 6-oxo-M<sub>1</sub>dG duplex.

**A**[dGTP] ( $\mu\text{M}$ )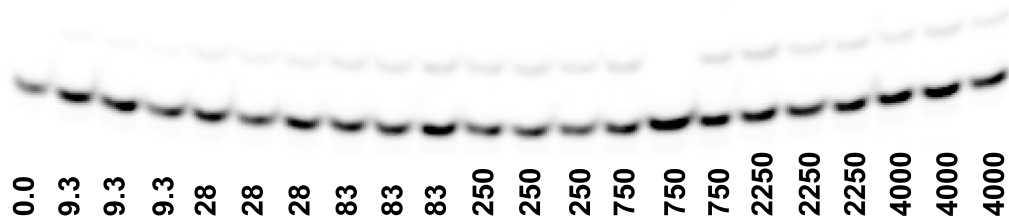**B**[dGTP] ( $\mu\text{M}$ )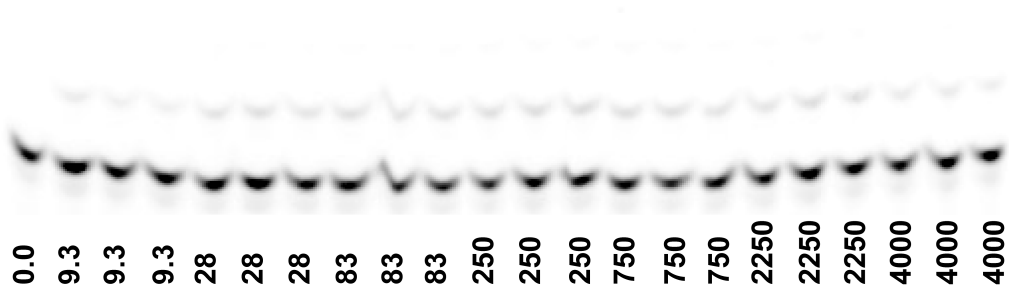

**Figure S5.** Incorporation of dGTP opposite dG (control template, A) and 6-oxo-M<sub>1</sub>dG (B). hPol  $\eta$  (50 nM for control duplex or 200 nM for 6-oxo-M<sub>1</sub>dG duplex) was incubated with 5  $\mu\text{M}$  DNA duplex and increasing concentrations of nucleotides. The reaction was stopped at 10 min.

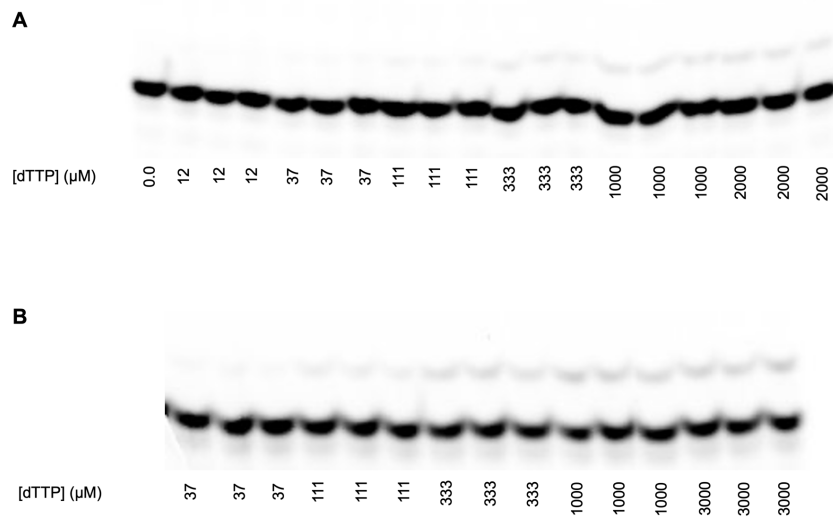

**Figure S6** Incorporation of dTTP opposite dG (control template, A) and 6-oxo-M<sub>1</sub>dG (B). hPol  $\eta$  (40 nM) was incubated with 5  $\mu\text{M}$  DNA duplex and increasing concentrations of nucleotides. The reaction was stopped at 5 min.

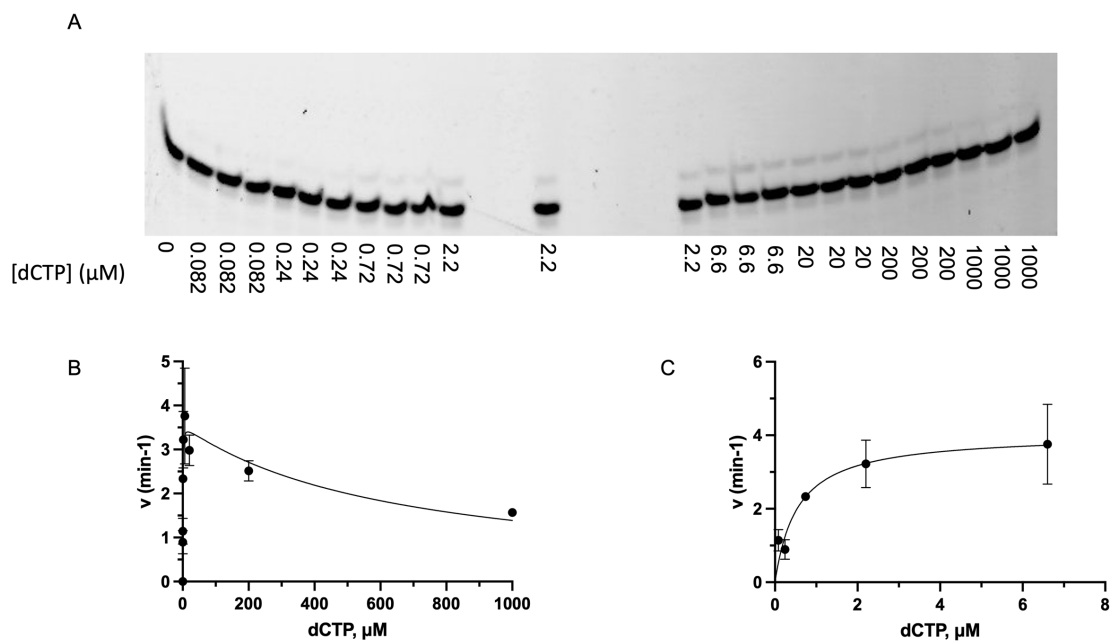

**Figure S7.** Steady state kinetics for dCTP, analyzed using gel electrophoresis. A, incorporation of dCTP opposite dG (control template). HPol  $\eta$  (1.6 nM) was incubated with 80 nM DNA duplex and increasing concentrations of nucleotides. The reaction was stopped at 1 min. B, each point represents the mean and standard deviation of triplicate determinations. Data was analyzed using the Substrate Inhibition model in GraphPad Prism. C, dCTP concentrations from 0-6.6  $\mu\text{M}$  from panel B are shown. Data was analyzed using the Michaelis-Menten model in GraphPad Prism.



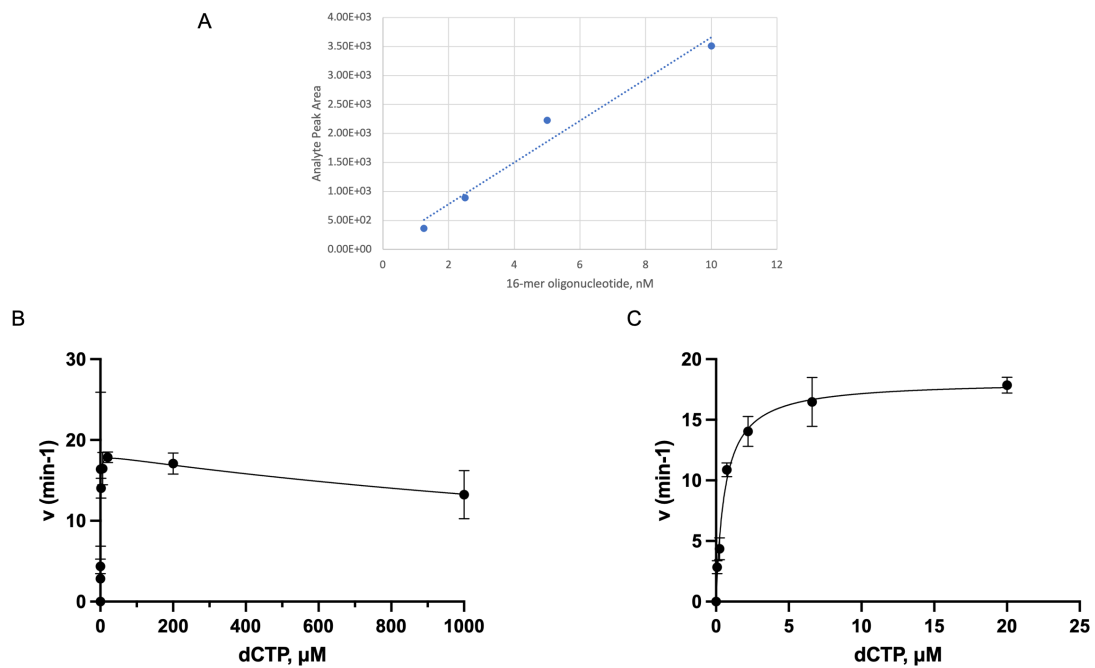

**Figure S8.** Steady state kinetics for dCTP, analyzed using LC-MS/MS analysis. A, standard curve of 16-mer oligonucleotide product using concentrations of 1.25 nM, 2.5 nM, 5 nM, and 10 nM. HPol  $\eta$  (1.6 nM) was incubated with 80 nM DNA duplex and increasing concentrations of nucleotides. The reaction was stopped at 1 min. B, each point represents the mean and standard deviation of triplicate determinations. Data was analyzed using the Substrate Inhibition model in GraphPad Prism. C, dCTP concentrations from 0-20  $\mu\text{M}$  from panel B are shown. Data was analyzed using the Michaelis-Menten model in GraphPad Prism.
